# Supplementary material
Source: PubMed Central journal article supplement (PMC3558298)
Supplement: supp_12-10959_IOVS-12-10959-s01.pdf [file supp_12-10959_IOVS-12-10959-s01.pdf]

## SUPPLEMENTARY INFORMATION

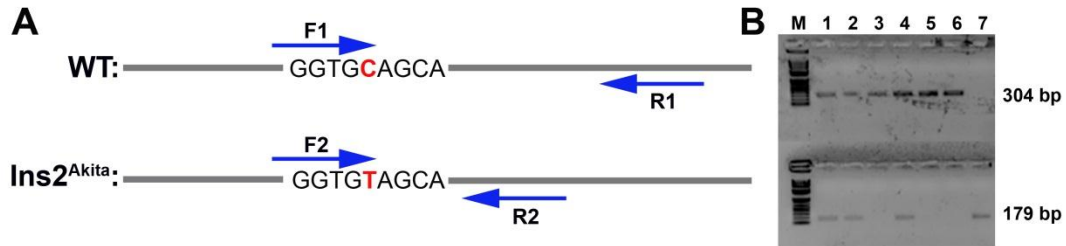

**Supplementary Figure 1. Ins2<sup>Akita</sup> genotyping.** The G to A mutation in the Ins2<sup>Akita</sup> results in the C96A amino acid substitution in the A chain of mature insulin. **A.** Genotyping was performed by PCR using the following primer pairs: F1: 5'-GAGGGAGCAGATGCTGGTGC-3' and R1: 5'-TGTGTCCATCCATGACCAGT-3' detect a 304 bp product from the WT allele, while F2: 5'-GAGGGAGCAGATGCTGGTGT-3' and R2: 5'-TGTGTCTTTGCTTCTGTGCTG-3' detect a 179 bp product from the mutant allele. **B.** Shown is a representative genotyping agarose gel. M: 1kb DNA markers. Lanes 1, 2, 4 are heterozygous mice, lanes 3, 5, 6, are WT mice, and lane 7 is a homozygous mouse.

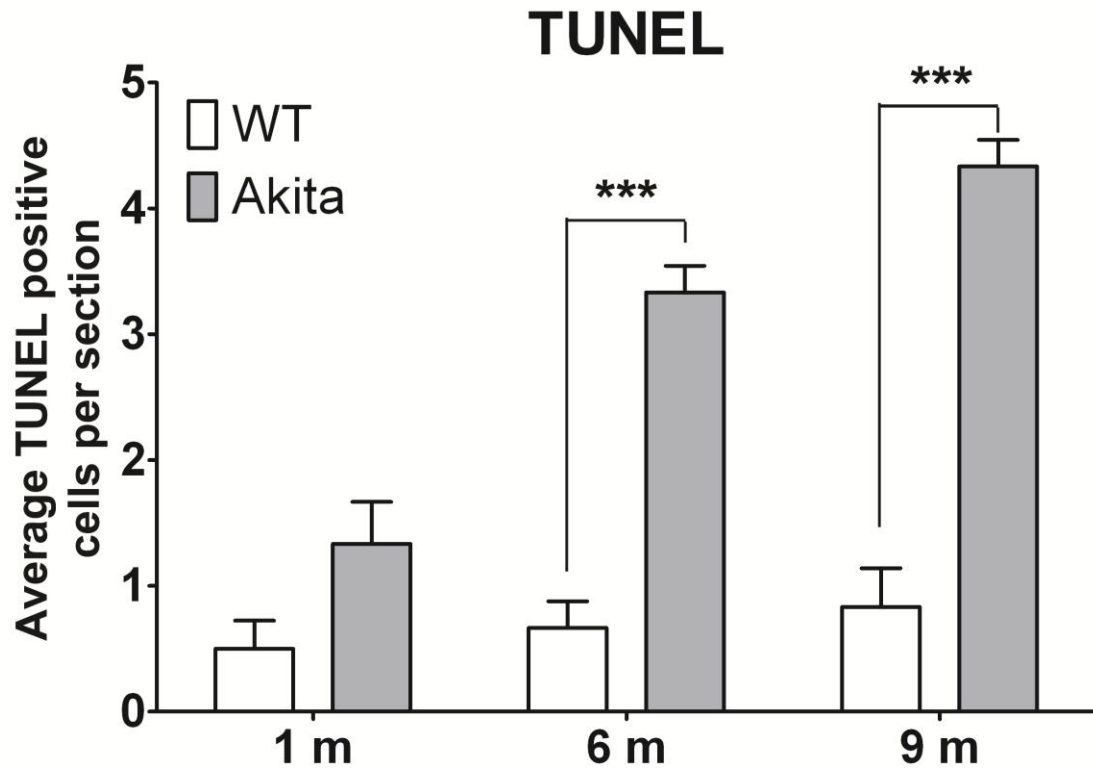

**Supplementary Figure 2. Increased apoptosis is detected in *Ins2<sup>Akita</sup>* retinas.** Retinal sections were TUNEL labeled and apoptotic cells were counted in six sections per eye then averaged to give a value for each eye. Values are mean  $\pm$  SE. \*\*  $P < 0.01$  and \*\*\*  $P < 0.001$  by two-way ANOVA (age and genotype) with Bonferroni's post-hoc comparisons. N=3-4 eyes/group.

**Supplementary Table 1. Primer Sequences for qRT-PCR**

| <b>Name</b>                     | <b>Forward</b>         | <b>Reverse</b>          |
|---------------------------------|------------------------|-------------------------|
| <b>hPEDF</b>                    | acaggacacgaaggctgccctg | cctagtccctctaagcctgcaca |
| <b>mVEGFA</b>                   | agcacagcagatgtgaatgc   | aatgctttctccgctctgaa    |
| <b>mVEGFR2</b>                  | taagggcatggagtcttgg    | cagagcaacacaccgaaaga    |
| <b>mTNF-<math>\alpha</math></b> | cgtcagccgattgctatct    | cggactccgcaaagtctaag    |
